# Supplementary material for: Palladium(ii) salts containing [PdCl4]2– and [Pd2Cl6]2– ions as pre-catalysts for the vinyl-polymerization of norbornene—evidence for the in situ formation of PdCl2 as the active speciesElectronic supplementary information (ESI) available: full 1H, 13C, 19F and 31P NMR and IR data of compounds 2C, 6 and 7 in combination with different amounts of B(C6F5). See http://www.rsc.org/suppdata/dt/b2/b209633a/
Source: Royal Society of Chemistry journal article supplement (doi:10.1039/b209633a), 2003-02-10
Supplement: b209633a.doc [file b209633a.doc]

**Supporting Materials:**

Palladium(II) salts containing [PdCl4]2- and [Pd2Cl6]2- ions as pre-catalysts for the vinyl-polymerization of norbornene — evidence for the in-situ formation of PdCl2 as the active species

Paul-Gerhard Lassahn, Vasile Lozan and Christoph Janiak*

Institut für Anorganische und Analytische Chemie, Universität Freiburg, Albertstr. 21, 79104 Freiburg, Germany. Fax: (int.) +49(0)761-2036147; E-mail: [janiak@uni-freiburg.de](mailto:janiak@uni-freiburg.de)

Table 1. 1H NMR data of pre-catalyst **2C** and the ligands **6** and **7** in combination with different amounts of B(C6F5)3 (measured at room temperature)

| compound  (molar ratio) | 1H NMR |
| --- | --- |
| [ppm (JPH Hz)] |
| **6** [a] | 2.41 (s, CH3 **6a**+**6b**), 4.50 (d, 19.4, CH **6b**), 6.10 (d, 11.6, CH2 **6a**), 7.2-8.0 (m, Haromatic **6a**+**6b**), 13.24 (s, OH **6b**) |
|  |  |
| **6**/B(C6F5)3(1:1) [a] | 2.25 (d, 2.2, CH3 **8**), 4.50 (d, 12.2, CH2 **8**), 7.3-7.9 (m, Haromatic **8**) |
|  |  |
| **6**/B(C6F5)3(1:1.5) [a] | 2.25 (d, 2.0, CH3 **8**), 4.41 (d, 12.2, CH2 **8**), 7.3-7.9 (m, Haromatic **8**) |
|  |  |
| **6**/B(C6F5)3(1:2) [a] | 2.26 (d, 2.2, CH3 **8**), 4.42 (d, 12.2, CH2 **8**), 7.3-7.9 (m, Haromatic **8**) |
|  |  |
| **6**/B(C6F5)3(1:3) [a] | 2.27 (d, 2.0, CH3 **8**), 4.41 (d, 12.2, CH2 **8**), 7.3-7.9 (m, Haromatic **8**) |
|  |  |
| **6**/B(C6F5)3(1:5) [a] | 2.27 (d, 2.2, CH3 **8**), 4.40 (d, 12.0, CH2 **8**), 7.3-7.9 (m Haromatic **8**) |
|  |  |
| **6**/B(C6F5)3(1:9) [a] | 2.28 (d, 2.0, CH3 **8**), 4.38 (d, 12.2, CH2 **8**), 7.3-7.9 (m, Haromatic **8**) |
|  |  |
| **7** [a] | 1.92 (d, 1.8, CH3), 3.56 (d, br, 12.7, CH), 7.2-7.7 (m) |
|  |  |
| **7**/B(C6F5)3(1:1) [a] | 1.55 (s, CH3 **9a**), 1.79 (s, CH3 **9b**), 2.28 (d, 2.2, CH3 **9c**), 4.14 (d, 14.2, CH **9c**), 4.28 (d, 12.2, CH **9a**), 4.36 (d, 18.0, CH **9b**), 7.1-7.9 (m, Haromatic **9a-c**) |
|  |  |
| **7**/B(C6F5)3(1:9) [a] | 2.20 (d, 1.4, CH3 **9c**), 4.20 (d, 12.4, CH **9c**), 7.2-7.9 (m, Haromatic **9c**) |
|  |  |
| **2C** [b] | 2.14 (d, 2.2, CH3), 5.32 (d, 12.6, CH2), 7.3-7.8 (m) |
|  |  |
| **2C**/B(C6F5)3 (1:9) [a],[c] | 2.30 (d, 2.0, CH3 **8**), 4.32 (d, 12.2, CH2 **8**), 7.4-7.9 (m, Haromatic **8**) |
|  |  |
| **2C**/B(C6F5)3 (1:9) [b],[d] | n.s. |
| n.s. = no signals; [a] solvent: CD2Cl2; [b] solvent: [D6]DMSO; [c] soluble part in CD2Cl2; [d] insoluble in CD2Cl2, dissolved in [D6]DMSO | |

Table 2. 31P NMR and 19F NMR data of pre-catalyst **2C** and the ligands **6** and **7** in combination with different amounts of B(C6F5)3 (measured at room temperature)

| compound  (molar ratio) | 31P NMR | 19F NMR [ppm (JFF Hz)] | | |
| --- | --- | --- | --- | --- |
| [ppm] | *o*-F | *p*-F | *m*-F |
| B(C6F5)3 [a] | n.s. | -130.24 (s, br) | -146.85 (s, br) | -161.94 (tdd, 20.7, 7.5, 2.8) |
|  |  |  |  |  |
| **6** [a] | 13.2 (**6b**),  19.6 (**6a**) | n.s. | n.s. | n.s. |
|  |  |  |  |  |
| **6**/B(C6F5)3 [a]  (1:1) | 19.5 (**8**) | -133.07 (dd, 23.5, 7.7)  -135.97 (d, br, 22.4, **10**) | -162.44 (t, 20.5)  -160.37 (t, 19.9, **10**) | -167.36 (m)  -166.02 (td, br, 22.1, 7.0, **10**) |
|  |  |  |  |  |
| **6**/B(C6F5)3 [a]  (1:1.5) | 19.5 (**8**) | -132.32 (d, 16.9)  -133.84 (s, br, **10**) | -158.65 (s, br)  -160.23 (t, 20.1, **10**) | -166.16 (s, br)  -166.28 (t, 19.9, **10**) |
|  |  |  |  |  |
| **6**/B(C6F5)3 [a]  (1:2) | 19.5 (**8**) | -131.23 (s, br)  -133.93 (s, br, **10**) | -154.07 (s, br)  -160.14 (t, 20.2, **10**) | -164.61 (s, br)  -166.22 (t, 18.7, **10**) |
|  |  |  |  |  |
| **6**/B(C6F5)3 [a]  (1:3) | 19.5 (**8**) | -130.46 (s, br)  -133.94 (s, br, **10**) | -150.63 (s, br)  -160.17 (t, 20.2, **10**) | -163.54 (s, br)  -166.25 (t, 18.8, **10**) |
|  |  |  |  |  |
| **6**/B(C6F5)3 [a]  (1:5) | 19.5 (**8**) | -129.84 (s, br)  -133.95 (s, br, **10**) | -148.39 (br)  -160.20 (t, 20.2, **10**) | -162.81 (s, br)  -166.27 (t, 18.9, **10**) |
|  |  |  |  |  |
| **6**/B(C6F5)3 [a]  (1:9) | 19.5 (**8**) | -129.62 (s, br)  -133.93 (s, br, **10**) | -147.31 (s, br)  -160.21 (t, 20.3, **10**) | -162.42 (s, br)  -166.27 (t, 19.1, **10**) |
|  |  |  |  |  |
| **7** [a] | 14.3 | n.s. | n.s. | n.s. |
|  |  |  |  |  |
| 7/B(C6F5)3 [a]  (1:1) | 12.5 (**9b**),  15.6 (**9a**),  19.4 (**9c**) | -134.36 (s, br, **9b**)  -134.56 (m, br, **9a**)  -133.95 (s, br, **9c**) | -161.42 (t, 19.0, **9b**)  -161.38 (t, 20.1, **9a**)  -160.13 (t, 20.2, **9c**) | -166.73 (t, 21.6, **9b**)  -166.70(t, 21.3, **9a**)  -166.21 (t, 18.8, **9c**) |
|  |  |  |  |  |
| **7**/B(C6F5)3 [a]  (1:9) | 19.4 (**9c**) | -131.82 (s, br)  -134.96 (s, br, **9c**) | -149.70 (s, br)  -160.21 (t, 20.2, **9c**) | -162.68 (m)  -166.28 (t, 19.0, **9c**) |
|  |  |  |  |  |
| **2C** [b] | 19.5 | n.s. | n.s. | n.s. |
|  |  |  |  |  |
| **2C**/B(C6F5)3 [a],[c]  (1:9) | 19.4 (**8**) | -129.60 (s, br)  -133.93 (s, br, **8**) | -146.12 (s, br)  -160.22 (t, 20.2, **8**) | -161.90  -166.27 (t, 19.7, **8**) |
|  |  |  |  |  |
| **2C**/B(C6F5)3 [b],[d]  (1:9) | n.s. | n.s. | n.s. | n.s. |
|  |  |  |  |  |
| Et4NCl/B(C6F5)3 [a]  (1:9) | n.s. | -133.23 (dd, 23.3, 7.7)  -135.85 (d, br, 20.9, **10**) | -162.54 (t, 20.3)  -160.62 (t, 20.2, **10**) | -167.52 (m)  -166.27 (td, 21.8, 6.7, **10**) |
|  |  |  |  |  |
| Et4NCl/B(C6F5)3 [a]  (1:9) | n.s. | -129.47 (s, br)  -133.95 (s, br, **10**) | -146.30 (s, br)  -160.24 (t, 20.2, **10**) | -162.03 (s, br)  -166.31 (t, 18.7, **10**) |
| n.s. = no signals; [a] solvent: CD2Cl2; [b] solvent: [D6]DMSO; [c] soluble part in CD2Cl2; [d] insoluble in CD2Cl2, dissolved in [D6]DMSO | | | | |

Table 3. 13C-NMR data of the compounds **6** and **7** in combination with different amounts of B(C6F5)3 (measured at room temperature)

| compound [a]  (molar ratio) | 13C-NMR [ppm (JPC respectively JCF Hz)] |
| --- | --- |
| B(C6F5)3 [a] | 112.05 (*ipso*-C), 136.46 (dm, 249.5, *m*-C), 143.61 (dm, 260.7, *p*-C), 147.18 (dm, 249.9, *o*-C) |
|  |  |
| **6** [b] | 23.34 (d, 12.8, CH3 **6b**), 31.81 (d, 6.8, CH3 **6a**), 40.07 (d, 58.4, CH2 **6a**), 69.78 (d, 99.78, CH **6b**), 118.69 (d, 89.0 Hz, *ipso*-C **6a**), 121.63 (d, 92.2, *ipso*-C **6b**), 129.43 (d, 12.6, *m*-C **6b**), 129.68 (d, 12.8, *m*-C **6a**), 133.95 (d, 10.6, *o*-C **6a**), 133.68 (d, 10.7, *o*-C **6b**), 133.64 (d, 3.0, *p*-C **6b**), 134.33 (d, 3.0, *p*-C **6a**), 181.14 (s, C(OH) **6b**), 200.69 (d, 7.0, C(O) **6a**) |
|  |  |
| **6**/B(C6F5)3 [a]  (1:1) | 31.09 (d, 5.9, CH3 **8**), 38.99 (d, 58.9, CH2 **8**), 116.65 (d, 89.3, *ipso*-C **8**), 122.63 (m, br, *ipso*-C **B**), 129.71 (d, 13.2, *m*-C **8**), 132.71 (d, 10.8, *o*-C **8**), 134.76 (d, 3.0, *p*-C **8**), 135.75 (dm, 243.1, *m*-C **B**), 138.11 (dm, 246.6, *p*-C **B**), 147.26 (dm, 246.6, *o*-C **B**), 197.5 (d, 7.0, C(O) **8**) |
|  |  |
| **6**/B(C6F5)3 [a]  (1:2) | 31.16 (d, 5.8, CH3 **8**), 39.05 (d, 58.9, CH2 **8**), 116.54 (d, 89.3, *ipso*-C **8**), 122.04 (m, br, *ipso*-C **B**), 129.79 (d, 13.1, *m*-C **8**), 132.70 (d, 10.7, *o*-C **8**), 134.88 (d, 3.1, *p*-C **8**), 136.32 (dm, 244.9, *m*-C **B**), 138.69 (dm, 245.4, *p*-C **B**), 147.42 (dm, 241.2, *o*-C **B**), 197.38 (d, 6.3, C(O) **8**) |
|  |  |
| **6**/B(C6F5)3 [c]  (1:9) | 31.30 (d, 5.8, CH3 **8**), 39.20 (d, 58.8, CH2 **8**), 113.06 (m, br, *ipso*-C, **B**), 116.36 (d, 89.4, *ipso*-C **8**), 129.93 (d, 13.2, *m*-C **8**), 132.69 (d, 10.7, *o*-C **8**), 135.09 (d, 3.0, *p*-C **8**), 136.81 (dm, 255.5, *m*-C **B**), 143.72 (dm, 255.6, *p*-C **B**), 147.56 (dm, 250.4, *o*-C **B**), 197.0 (s, C(O) **8**) |
|  |  |
| **7** [b] | 26.77 (d, 16.0, CH3 **7**), 49.29 (d, 108.1, CH **7**), 126.28 (d, 90.4, *ipso*-C **7**), 127.44 (d, 12.2, *m*-C **7**), 130.67 (d, 2.9, *p*-C **7**), 131.77 (d, 10.2, *o*-C **7**), 188.96 (d, 2.2, C(O) **7**) |
|  |  |
| **7**/B(C6F5)3 [a]  (1:1) | 23.62 (d, 14.2, CH3 **9b**), 24.22 (d, 2.6, CH3 **9a**), 31.25 (d, 6.0, CH3 **9c**), 39.16 (d, 59.2, CH **9c**), 68.46 (s, CH **9b**), 70.49 (s, CH **9a**), 116.28 (d, 89.3, *ipso*-C **9c**), 121.44 (d, 91.5, *ipso*-C **9a**), 121.75 (d, 92.2, *ipso*-C **9b**), 128.43 (d, 12.8, *m*-C **9b**), 129.22 (d, 12.8, *m*-C **9a**), 129.92 (d, 13.2, *m*-C **9c**), 132.02 (d, 10.4, *o*-C **9a**), 132.54 (d, 10.4, *o*-C **9b**), 132.65 (d, 10.0, *o*-C **9c**), 133.38 (d, 2.9, *p*-C **9a**), 135.10 (d, 3.0, *p*-C **9c**), 135.86 (dm, 251.6, *m*-C **B**), 138.41 (dm, 247.2, *p*-C **B**), 146.97 (dm, 247.2, *o*-C **B**), 179.76 (d, 13.6, C(O) **9a**), 182.35 (d, 1.9, C(O) **9b**), 196.95 (s, weak, C(O) **9c**), *p*-C of **9b** overlayed by the signal group between 132.3-132.9 ppm |
|  |  |
| **7**/B(C6F5)3 [c]  (1:9) | 31.54 (d, 5.6, CH3 **9c**), 39.45 (d, 58.6, CH **9c**), 113.99 (m, br, *ipso*-C **B**), 116.48 (d, 89.3, *ipso*-C **9c**), 130.18 (d, 13.3, *m*-C **9c**), 132.88 (d, 10.8, *o*-C **9c**), 135.37 (d, 3.2, *p*-C **9c**), 136.95 (dm, 255.3, *m*-C **B**), 142.87 (dm, 264.4, *p*-C **B**), 147.63 (dm, 244.1, *o*-C **B**), 197.23 (s, C(O) **9c**) |
| **B** = B(C6F5)3; [a] 0.07 mmol B(C6F5)3 dissolved in 0.6 mL CD2Cl2; [b] 0.07 mmol compound dissolved in 0.6 mL CD2Cl2; [c] 0.007 mmol compound and 0.063 mmol B(C6F5)3 dissolved in 0.6 mL CD2Cl2; | |

Table 4. IR data of the compounds **6** and **7** in combination with different amounts of B(C6F5)3 (measured in CD2Cl2 at room temperature)

| comp.[a] | molar ratio | IR [b] |
| --- | --- | --- |
| Pd/lig:**B** | [cm-1] |
| CD2Cl2 | 1:-- | 1751 |
|  |  |  |
| B(C6F5)3 | --:1 | 1751, 1647, 1522 |
|  |  |  |
| **6** | 1:-- | 1751, 1718, 1608 |
|  |  |  |
| **6** | 1:1 | 1751, 1725, 1644, 1589, 1516 |
|  |  |  |
| **6** [c] | 1:9 | 1751, 1727, 1647, 1520 |
|  |  |  |
| **7** | 1:-- | 1751, 1536 |
|  |  |  |
| **7** | 1:1 | 1751, 1727, 1644, 1553, 1515 |
|  |  |  |
| **7** [c] | 1:9 | 1751, 1727, 1648, 1520 |
| comp. = compound; lig = ligand; **B** = B(C6F5)3; [a] 0.07 mmol compound dissolved in 0.6 mL CD2Cl2; [b] IR signals between 1800 cm-1 and 1500 cm-1; [c] 0.007 mmol compound and 0.063 mmol B(C6F5)3 dissolved in 0.6 mL CD2Cl2; | | |
